# Supplementary material for: Non-singular spherical harmonic expressions of geomagnetic vector and gradient tensor fields in the local north-oriented reference frame
Source: Copernicus journal article supplement (doi:10.5194/gmd-8-1979-2015), 2015-07-07
Supplement: Supplementary file 1 [file gmd-8-1979-2015-supplement-cover-letter.pdf › gmd-8-1979-2015-supplement-cover-letter.pdf]

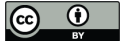

## *Supplement of*

# **Non-singular spherical harmonic expressions of geomagnetic vector and gradient tensor fields in the local north-oriented reference frame**

**J. Du et al.**

*Correspondence to:* J. Du ([jinsongdu.cug@gmail.com](mailto:jinsongdu.cug@gmail.com))

- [gmd-8-1979-2015-supplement-cover-letter.pdf](#)
- [gmd-2014-215\\_Jinsong Du\\_Supplement\\_20150523](#)
  - GRIMM\_L120\_V0.0.cof
  - MagCalc.cpp
  - Notes\_for\_the\_input\_data.txt

The copyright of individual parts of the supplement might differ from the CC-BY 3.0 licence.
